# Supplementary material for: Coupling carbon nanotube film microextraction with desorption corona beam ionization for rapid analysis of Sudan dyes (I–IV) and Rhodamine B in chilli oil
Source: Royal Society of Chemistry journal article supplement (doi:10.1039/c4an02044h), 2015-01-01
Supplement: c4an02044h1.pdf [file c4an02044h1.pdf]

## Supporting Information

for

### **“Coupling carbon nanotube film microextraction with desorption corona beam ionization for rapid analysis of Sudan dyes (I–IV) and Rhodamine B in chilli oil”**

Di Chen <sup>a</sup>, Yun-Qing Huang <sup>b</sup>, Xiao-Mei He <sup>a</sup>, Zhi-Guo Shi <sup>a</sup>, Yu-Qi Feng <sup>a,\*</sup>

<sup>a</sup> Key Laboratory of Analytical Chemistry for Biology and Medicine (Ministry of Education),  
Department of Chemistry, Wuhan University, Wuhan 430072, China

<sup>b</sup> Shimadzu Research Laboratory (Shanghai) Co., Ltd , Shanghai 201201, China

\* To whom correspondence should be addressed. Tel.:+86-27-68755595; fax: +86-27-68755595. E-mail address: yqfeng@whu.edu.cn

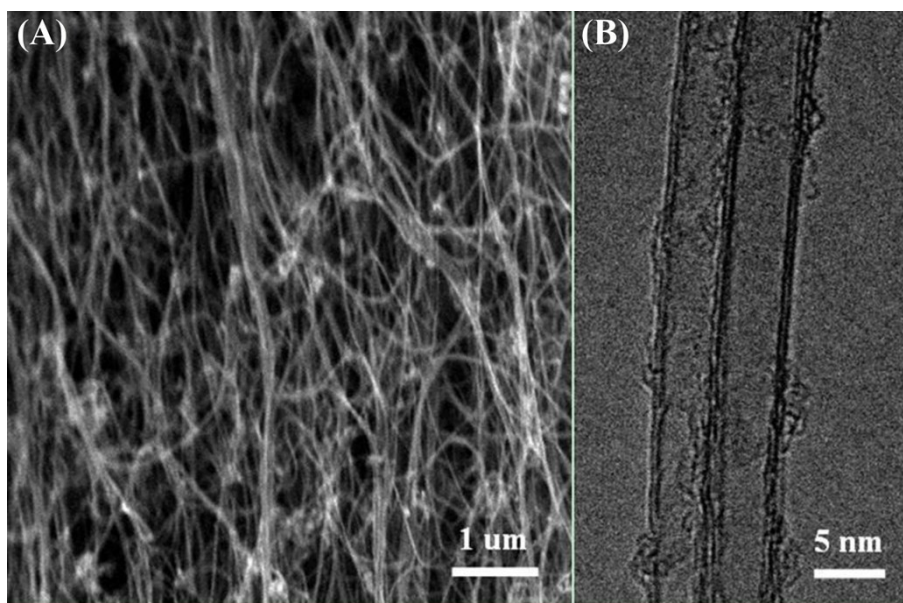

**Figure S1.** Image of carbon nanotube film. (A) SEM, and (B) TEM. (Provided by Yijie Technologies Co., Ltd. (Shanghai, China))

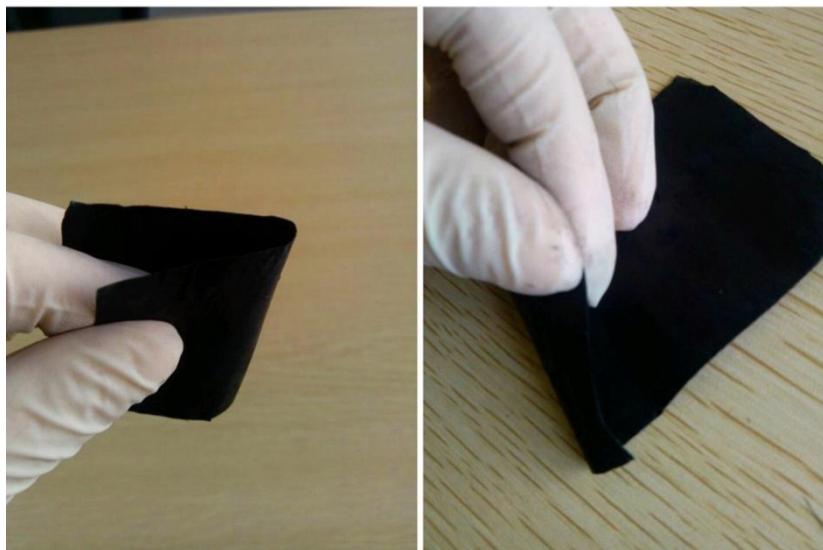

**Figure S2.** Photographs of carbon nanotube film. (Provided by Yijie Technologies Co., Ltd. (Shanghai, China))

Table S1. Calibration curves, LODs and LOQs data of Sudan dyes and Rhodamine B in chilli powder.

| Analytes       | Linear range<br>( $\mu\text{g/g}$ ) | Regression line               |                               |        | LOD<br>(ng/g) | LOQ<br>(ng/g) |
|----------------|-------------------------------------|-------------------------------|-------------------------------|--------|---------------|---------------|
|                |                                     | Slope                         | Intercept                     | $R^2$  |               |               |
| Sudan I        | 0.1-20                              | 74949.7<br>( $\pm 3611.9$ )   | 346512.7<br>( $\pm 29407.6$ ) | 0.9769 | 5             | 15            |
| Sudan II       | 0.1-20                              | 834161.8<br>( $\pm 48576.0$ ) | 42769.4<br>( $\pm 395492.2$ ) | 0.9801 | 2             | 6             |
| Sudan III      | 0.1-20                              | 93368.9<br>( $\pm 3383.0$ )   | 144001.0<br>( $\pm 27543.5$ ) | 0.9667 | 20            | 60            |
| Sudan IV       | 0.1-20                              | 96365.6<br>( $\pm 4271.7$ )   | 188703.2<br>( $\pm 34779.0$ ) | 0.9513 | 20            | 60            |
| Rhodamine<br>B | 0.1-20                              | 259575.2<br>( $\pm 10920.0$ ) | 400906.1<br>( $\pm 88907.6$ ) | 0.9895 | 10            | 30            |

Table S2. Recoveries of five dyes in chilli powder sample.

| Analytes    | Added ( $\mu\text{g/g}$ ) | Found ( $\mu\text{g/g}$ ) | Recovery (%) | RSD (% , n=5) |
|-------------|---------------------------|---------------------------|--------------|---------------|
| Sudan I     | 0.5                       | 0.42                      | 84.30        | 19.04         |
|             | 1.6                       | 1.80                      | 112.35       | 11.59         |
|             | 16                        | 17.43                     | 108.95       | 14.23         |
| Sudan II    | 0.5                       | 0.45                      | 90.63        | 16.03         |
|             | 1.6                       | 15.73                     | 98.34        | 16.49         |
|             | 16                        | 16.87                     | 105.46       | 15.08         |
| Sudan III   | 0.5                       | 0.44                      | 87.50        | 16.32         |
|             | 1.6                       | 1.85                      | 115.72       | 14.56         |
|             | 16                        | 16.68                     | 104.25       | 16.78         |
| Sudan IV    | 0.5                       | 0.49                      | 98.92        | 18.22         |
|             | 1.6                       | 1.74                      | 108.56       | 13.46         |
|             | 16                        | 1.49                      | 93.22        | 13.50         |
| Rhodamine B | 0.5                       | 0.44                      | 88.36        | 19.22         |
|             | 1.6                       | 1.78                      | 111.25       | 14.53         |
|             | 16                        | 16.27                     | 101.68       | 12.10         |
